# Supplementary material
Source: HighWire-hosted journal article supplement (https://hw-f5-jim.highwire.org/content/70/1/46)
Supplement: inline-supplementary-material-1 [file inline-supplementary-material-1.pdf]

**Table S1: Details of search strategy**

| Search strategy for PubMed database (from its inception to May, 2021)  |                                                                                                                                                                                                                                                                                                                                                                                                                                                                                                                                                                                                                                                                                                                                                                                                   |             |
|------------------------------------------------------------------------|---------------------------------------------------------------------------------------------------------------------------------------------------------------------------------------------------------------------------------------------------------------------------------------------------------------------------------------------------------------------------------------------------------------------------------------------------------------------------------------------------------------------------------------------------------------------------------------------------------------------------------------------------------------------------------------------------------------------------------------------------------------------------------------------------|-------------|
| No.                                                                    | Search strategy                                                                                                                                                                                                                                                                                                                                                                                                                                                                                                                                                                                                                                                                                                                                                                                   | Items found |
| #1                                                                     | ((((((((("hypertone"[All Fields] OR "hypertonic"[All Fields]) OR "hypertonic"[All Fields]) OR "muscle hypertonia"[MeSH Terms]) OR ("muscle"[All Fields] AND "hypertonia"[All Fields]) OR "muscle hypertonia"[All Fields]) OR "hypertonicity"[All Fields]) OR ("high"[All Fields] AND (((("osmosis"[MeSH Terms] OR "osmosis"[All Fields]) OR "osmotic"[All Fields]) OR "osmotical"[All Fields]) OR "osmotically"[All Fields]) OR "osmotics"[All Fields]))) OR 3[UID]) OR 5[UID]) OR 7[UID]                                                                                                                                                                                                                                                                                                         | 48123       |
| #2                                                                     | (((("saline solution"[MeSH Terms] OR ("saline"[All Fields] AND "solution"[All Fields]) OR "saline solution"[All Fields]) OR "saline"[All Fields]) OR "salines"[All Fields]) OR (((((((("pharmaceutical solutions"[Pharmacological Action] OR "solutions"[MeSH Terms]) OR "solutions"[All Fields]) OR "solution"[All Fields]) OR "pharmaceutical solutions"[MeSH Terms]) OR ("pharmaceutical"[All Fields] AND "solutions"[All Fields]) OR "pharmaceutical solutions"[All Fields]) OR "solutal"[All Fields]) OR "solute"[All Fields]) OR "solute s"[All Fields]) OR "soluted"[All Fields]) OR "solute s"[All Fields]) OR "solution s"[All Fields])) OR ("sodium chloride"[MeSH Terms] OR ("sodium"[All Fields] AND "chloride"[All Fields]) OR "sodium chloride"[All Fields])                        | 1074253     |
| #3                                                                     | (((("bronchiolitis"[MeSH Terms] OR "bronchiolitis"[All Fields]) OR "bronchiolitides"[All Fields]) OR (((("bronchopneumonia"[MeSH Terms] OR "bronchopneumonia"[All Fields]) OR "bronchopneumonias"[All Fields]) OR "bronchopneumoniae"[All Fields])) OR (((("respiratory syncytial viruses"[MeSH Terms] OR ("respiratory"[All Fields] AND "syncytial"[All Fields]) AND "viruses"[All Fields])) OR "respiratory syncytial viruses"[All Fields]) OR ((("respiratory"[All Fields] AND "syncytial"[All Fields]) AND "virus"[All Fields])) OR "respiratory syncytial virus"[All Fields])) OR ((("respiratory syncytial viruses"[MeSH Terms] OR ("respiratory"[All Fields] AND "syncytial"[All Fields]) AND "viruses"[All Fields])) OR "respiratory syncytial viruses"[All Fields]) OR "RSV"[All Fields] | 37957       |
| #4                                                                     | #1 AND #2 AND #3                                                                                                                                                                                                                                                                                                                                                                                                                                                                                                                                                                                                                                                                                                                                                                                  | 202         |
| Search strategy for EMBASE database (from its inception to May, 2021)  |                                                                                                                                                                                                                                                                                                                                                                                                                                                                                                                                                                                                                                                                                                                                                                                                   |             |
| No.                                                                    | Search strategy                                                                                                                                                                                                                                                                                                                                                                                                                                                                                                                                                                                                                                                                                                                                                                                   | Items found |
| #1                                                                     | hypertonic OR high osmotic OR 3% OR 5% OR 7%                                                                                                                                                                                                                                                                                                                                                                                                                                                                                                                                                                                                                                                                                                                                                      | 37608       |
| #2                                                                     | saline OR Sodium Chloride OR solution                                                                                                                                                                                                                                                                                                                                                                                                                                                                                                                                                                                                                                                                                                                                                             | 1076968     |
| #3                                                                     | bronchiolitis OR bronchopneumonia OR respiratory syncytial virus OR respiratory syncytial viruses OR RSV                                                                                                                                                                                                                                                                                                                                                                                                                                                                                                                                                                                                                                                                                          | 61574       |
| #4                                                                     | #1 AND #2 AND #3                                                                                                                                                                                                                                                                                                                                                                                                                                                                                                                                                                                                                                                                                                                                                                                  | 335         |
| Search strategy for CENTRAL database (from its inception to May, 2021) |                                                                                                                                                                                                                                                                                                                                                                                                                                                                                                                                                                                                                                                                                                                                                                                                   |             |
| No.                                                                    | Search strategy                                                                                                                                                                                                                                                                                                                                                                                                                                                                                                                                                                                                                                                                                                                                                                                   | Items found |
| #1                                                                     | hypertonic OR high osmotic OR 3% OR 5% OR 7%                                                                                                                                                                                                                                                                                                                                                                                                                                                                                                                                                                                                                                                                                                                                                      | 1318529     |
| #2                                                                     | saline OR solution OR Sodium Chloride                                                                                                                                                                                                                                                                                                                                                                                                                                                                                                                                                                                                                                                                                                                                                             | 76096       |
| #3                                                                     | bronchiolitis OR bronchopneumonia OR respiratory syncytial virus OR respiratory syncytial viruses OR RSV                                                                                                                                                                                                                                                                                                                                                                                                                                                                                                                                                                                                                                                                                          | 2598        |
| #4                                                                     | #1 AND #2 AND #3                                                                                                                                                                                                                                                                                                                                                                                                                                                                                                                                                                                                                                                                                                                                                                                  | 383         |

**Table S2: relevant ongoing studies in the international trial registers**

| ClinicalTrials.gov |               |
|--------------------|---------------|
| NCT02029040        | bronchiolitis |
| NCT01238848        | bronchiolitis |
| NCT04140214        | bronchiolitis |
| NCT03880903        | bronchiolitis |
| NCT03143231        | bronchiolitis |

  

| ISRCTN Registry |  |
|-----------------|--|
| None            |  |

**Table S3: Characteristic of included studies**

| Study           | Location           | Study design | Age (months)                                                                                | Sample size | Intervention                | Control                       | Method                                                                      | Outcomes                  |
|-----------------|--------------------|--------------|---------------------------------------------------------------------------------------------|-------------|-----------------------------|-------------------------------|-----------------------------------------------------------------------------|---------------------------|
| Al-Ansari 2010  | Qatar (2007-2008)  | RCT          | Con 3.30±2.43, 3%HS<br>3.84±2.84, 5%HS<br>4.02±2.56                                         | 171         | HS(5%)+ Epi,<br>HS(3%)+ Epi | NS(0.9%)+ Epi                 | Every 4h until discharge                                                    | LOS, CSS (Wang et al), AE |
| Angoulvant 2017 | France (2012-2014) | RCT          | Con 3 (2-5), 3%HS<br>3 (2-5)*                                                               | 772         | HS(3%)                      | NS(0.9%)                      | 20 minutes per time for twice                                               | ROH, AE                   |
| Anil 2010       | Turkey (2005-2006) | RCT          | NS+Epi 10.4±5.7,<br>3%HS+Epi 9.4±5.0,<br>NS+Sal 9.0±6.2,<br>3%HS+Sal 9.7±6.2,<br>NS 9.1±4.4 | 186         | HS(3%)+ Epi/Sal             | NS(0.9%)+ Epi/Sal or NS alone | Twice at 30-min interval                                                    | ROH, AE                   |
| Bashir 2018     | India (2014-2015)  | RCT          | Con 4.0 (2.0-7.0),<br>3%HS 4.0 (2.63-8.0)#                                                  | 189         | HS(3%)                      | NS(0.9%)                      | 2h for 3 doses, followed by 4h for 6 doses, followed by 6h until discharge. | LOS, CSS (Wang et al), AE |

|              |                         |     |                                                                                         |     |                                   |                                           |                                                                                                |                                                         |
|--------------|-------------------------|-----|-----------------------------------------------------------------------------------------|-----|-----------------------------------|-------------------------------------------|------------------------------------------------------------------------------------------------|---------------------------------------------------------|
| Everard 2014 | UK (2011-2013)          | RCT | Con<br>3.4±2.8,<br>3%HS<br>3.3±2.6                                                      | 291 | HS(3%)                            | supportive<br>care without<br>inhalations | Every 6h<br>once the<br>primary<br>outcome<br>had been<br>achieved.                            | LOS, AE                                                 |
| Flores 2016  | Portugal<br>(2012-2014) | RCT | Con<br>3.8±2.5,<br>3%HS<br>3.3±2.4                                                      | 68  | HS(3%)+<br>Sal                    | NS(0.9%)+<br>Sal                          | Every 6 h<br>until<br>discharge                                                                | LOS,<br>CSS<br>(Wang et<br>al), AE                      |
| Florin 2014  | US (2010-2011)          | RCT | Con<br>6.1±3.6,<br>3%HS<br>7.2±5.1                                                      | 62  | HS(3%)+Epi                        | NS(0.9%)+<br>Epi                          | Once                                                                                           | ROH,<br>AE                                              |
| Grewal 2009  | Canada<br>(2004-2005)   | RCT | Con<br>4.4±3.4,<br>3%HS<br>5.6±4.0                                                      | 46  | HS(3%)+Epi                        | NS(0.9%)+<br>Epi                          | Four times<br>in 120<br>minutes                                                                | ROH,<br>AE                                              |
| Ipek 2011    | Turkey<br>(2009-2010)   | RCT | NS+Sal<br>8.13±4.75,<br>NS<br>7.40±3.08,<br>3%HS+Sal<br>7.90±3.57,<br>3%HS<br>8.40±4.19 | 120 | HS(3%)<br>with/withou<br>t Sal    | NS(0.9%)<br>with/without<br>Sal           | Every 20<br>min until 3<br>doses had<br>been<br>administere<br>d (0, 20 and<br>40th min).      | ROH,<br>CSS<br>(Wang et<br>al), AE                      |
| Jacobs 2013  | US (2010-2012)          | RCT | Con<br>5.6±3.3,<br>3%HS<br>6.0±3.9                                                      | 101 | HS(7%)+<br>Epi                    | NS(0.9%)+<br>Epi                          | Every 6h<br>until<br>discharge<br>from ED                                                      | ROH,<br>CSS<br>(modifie<br>d from<br>Wang et<br>al), AE |
| Khanal 2015  | Nepal(2014)             | RCT | Con 9.51<br>±4.28, 3%<br>HS<br>9.82±5.06                                                | 100 | HS(3%)+<br>L-Epi                  | NS(0.9%)+<br>L-Epi                        | Twice                                                                                          | CSS<br>(Wang et<br>al), AE                              |
| Köse 2016    | Turkey<br>(2014)        | RCT | Con 7.6<br>(1-18),<br>3%HS 7.6<br>(2-23),<br>7%HS 7.7<br>(1-24)#                        | 104 | HS(7%)+<br>Sal,<br>HS(3%)+<br>Sal | NS(0.9%)+<br>Sal                          | Every 6h<br>until<br>discharge                                                                 | LOS,<br>CSS<br>(Wang et<br>al), AE                      |
| Kuzik 2007   | Canada<br>(2003-2006)   | RCT | Con 9.51<br>±4.28<br>4.6±4.7,<br>3%HS<br>4.4±3.7                                        | 96  | HS(3%)+<br>Sal                    | NS(0.9%)+<br>Sal                          | Every 2h<br>for 3 doses,<br>followed<br>by every 4h<br>for 5 doses,<br>followed<br>by every 6h | LOS, AE                                                 |

|                   |                    |     |                                                        |     |                   |              |                                                                                                 |                           |
|-------------------|--------------------|-----|--------------------------------------------------------|-----|-------------------|--------------|-------------------------------------------------------------------------------------------------|---------------------------|
|                   |                    |     |                                                        |     |                   |              | until discharge                                                                                 |                           |
| Kuzik 2010        | Canada (2008-2009) | RCT | Con<br>9.2±5.2,<br>3%HS<br>8.6±5.6                     | 81  | HS(3%)+Sal        | NS(0.9%)+Sal | Three times in 1h                                                                               | ROH, CSS (RDAI), AE       |
| Li 2014           | China (2012-2013)  | RCT | Con<br>7.6±3.9,<br>3%HS<br>6.7±3.1,<br>5%HS<br>6.7±3.6 | 124 | HS(5%),<br>HS(3%) | NS(0.9%)     | Twice per day for 3 days                                                                        | CSS (Wang et al), AE      |
| Luo 2010          | China (2007-2008)  | RCT | Con<br>5.6±4.5,<br>3%HS<br>6.0±4.3                     | 93  | HS(3%)+Sal        | NS(0.9%)+Sal | Every 8h until discharge                                                                        | LOS, CSS (Wang et al), AE |
| Luo 2011          | China (2008-2009)  | RCT | Con<br>5.8±4.3,<br>3%HS<br>5.9±4.1                     | 112 | HS(3%)            | NS(0.9%)     | Every 2 h for 3 doses, followed by every 4 h for 5 doses, followed by every 6 h until discharge | LOS, CSS (Wang et al), AE |
| Mahesh Kumar 2013 | India (2007-2009)  | RCT | 5.93±3.83                                              | 40  | HS(3%)+Sal        | NS(0.9%)+Sal | Every 6h until discharge                                                                        | LOS, CSS (Wang et al)     |
| Mandelberg 2003   | Israel (2000-2001) | RCT | Con<br>2.6±1.9,<br>3% HS<br>3±1.2                      | 53  | HS(3%)+Epi        | NS(0.9%)+Epi | Every 8h until discharge                                                                        | LOS, CSS (Wang et al), AE |
| Miraglia2012      | Italy (2008-2010)  | RCT | Con<br>4.2±1.6,<br>3%HS<br>4.8±1.3                     | 106 | HS(3%)+Epi        | NS(0.9%)+Epi | Every 6h until discharge                                                                        | LOS, CSS (Wang et al)     |
| Morikawa 2018     | Japan (2008-2013)  | RCT | Con<br>4.2±3.0,<br>HS<br>4.4±3.1                       | 128 | HS(3%)+Sal        | NS(0.9%)+Sal | Four times daily until discharge                                                                | LOS, CSS (Wang et al), AE |
| Ojha 2014         | Nepal (2012-2013)  | RCT | Con<br>8.51±4.24,<br>3%HS                              | 59  | HS(3%)            | NS(0.9%)     | Every 8h until discharge                                                                        | LOS, CSS                  |

|                       |                         |     |                                           |     |                        |                      |                                          |                           |
|-----------------------|-------------------------|-----|-------------------------------------------|-----|------------------------|----------------------|------------------------------------------|---------------------------|
|                       |                         |     | 8.61±5.74<br>2                            |     |                        |                      |                                          | (Wang et al), AE          |
| Pandit 2013           | India (2009-2011)       | RCT | Con 4.08 ± 1.90, 3%HS 3.92 ± 1.72         | 100 | HS(3%)+A dr            | NS(0.9%)+A dr        | Three times with an interval of one hour | LOS, CSS (RDAI), AE       |
| Park 2015             | korea (2003-2004)       | RCT | Con 6.1 ± 3.2, 3%HS 5.6±2.7               | 80  | HS(3%)+fenoterol       | NS(0.9%)+fenoterol   | Every 6h until discharge                 | LOS, CSS (Wang et al), AE |
| Ratajczyk-Pekrul 2016 | Poland (2011-2013)      | RCT | Con 4.43, 3%HS 5.34                       | 78  | HS(3%)+Sa 1            | NS(0.9%)+Sa 1        | Every 4h until discharge                 | LOS, CSS (Wang et al), AE |
| Sarrell 2002          | Israel (2000-2001)      | RCT | Con 12.3± 1.1, 3%HS 12.1±0.9              | 65  | HS(3%)+terbutaline     | NS(0.9%)+terbutaline | Every 8h for 5 days                      | ROH, CSS (Wang et al), AE |
| Sharma 2013           | India (2009-2010)       | RCT | Con 4.18±4.24, 3%HS 4.93±4.31             | 248 | HS(3%)+Sa 1            | NS(0.9%)+Sa 1        | Every 4h until discharge                 | LOS, CSS (Wang et al), AE |
| Silver 2015           | US (2011-2014)          | RCT | Con 4.4±3.0, 3%HS 3.9±3.0                 | 227 | HS(3%)                 | NS(0.9%)             | Every 4h until discharge                 | LOS, CSS (RDAI), AE       |
| Tal 2006              | Israel (2001-2002)      | RCT | Con 2.3±0.7, 3%HS 2.8±1.2                 | 41  | HS(3%)+Epi             | NS(0.9%)+Epi         | Every 8h until discharge                 | LOS, CSS (Wang et al), AE |
| Teunissen 2014        | Netherlands (2009-2011) | RCT | Con 3.6±5.0, 3% HS 3.6±5.2, 6% HS 3.4±3.8 | 247 | HS(6%)+Sal, HS(3%)+Sal | NS(0.9%)+Sal         | Every 8h until discharge                 | LOS, CSS (Wang et al), AE |
| Tinsa 2014            | Tunis (2012)            | RCT | Con 3.06±2.47, 5%HS 3.76±2.8              | 94  | HS(5%)                 | NS(0.9%)             | Every 4h until ready for discharge       | LOS, CSS (Wang et al), AE |
| Uysalol 2017          | Turkey (2011-2012)      | RCT | Con 7 (4-10), 3%HS 7 (4-10)*              | 156 | HS(3%)                 | NS(0.9%)             | Every 4h until discharge                 | LOS, AE                   |

|                   |                            |     |                                           |     |                |                                           |                                                                                                                                 |                                      |
|-------------------|----------------------------|-----|-------------------------------------------|-----|----------------|-------------------------------------------|---------------------------------------------------------------------------------------------------------------------------------|--------------------------------------|
| Wu 2014           | US (2008-2011)             | RCT | Con<br>6.40±5.33,<br>3% HS<br>6.57±5.17   | 408 | HS(3%)+<br>Sal | NS(0.9%)+<br>Sal                          | Every 20<br>minutes to<br>3 doses in<br>ED,<br>admitted<br>patients<br>continued<br>receiving<br>every 8h<br>until<br>discharge | ROH,<br>LOS,<br>CSS<br>(RDAI),<br>AE |
| Hmar 2021         | India<br>(2016-2018)       | RCT | Con<br>10.02±5.4<br>5, 3% HS<br>8.45±4.88 | 158 | HS(3%)+<br>Sal | NS(0.9%)+<br>Sal                          | Every 6h<br>until<br>discharge                                                                                                  | LOS,<br>CSS<br>(Wang et<br>al)       |
| Raphaelle<br>2019 | Switzerland<br>(2013-2016) | RCT | Con<br>7.7±5.48,<br>3% HS<br>7.7±5.07     | 120 | HS(3%)         | supportive<br>care without<br>inhalations | Every 6h<br>until<br>discharge                                                                                                  | LOS,<br>CSS<br>(Wang et<br>al)       |

HS: hypertonic saline, NS: normal saline, RCT: Randomized controlled study, LOS: length of stay in hospital, ROH: rate of hospitalization, CSS: clinical severity scores, AE: adverse event, ED: emergency department, \*: median (25th, 75th), #: median (range), &: median (IQR).

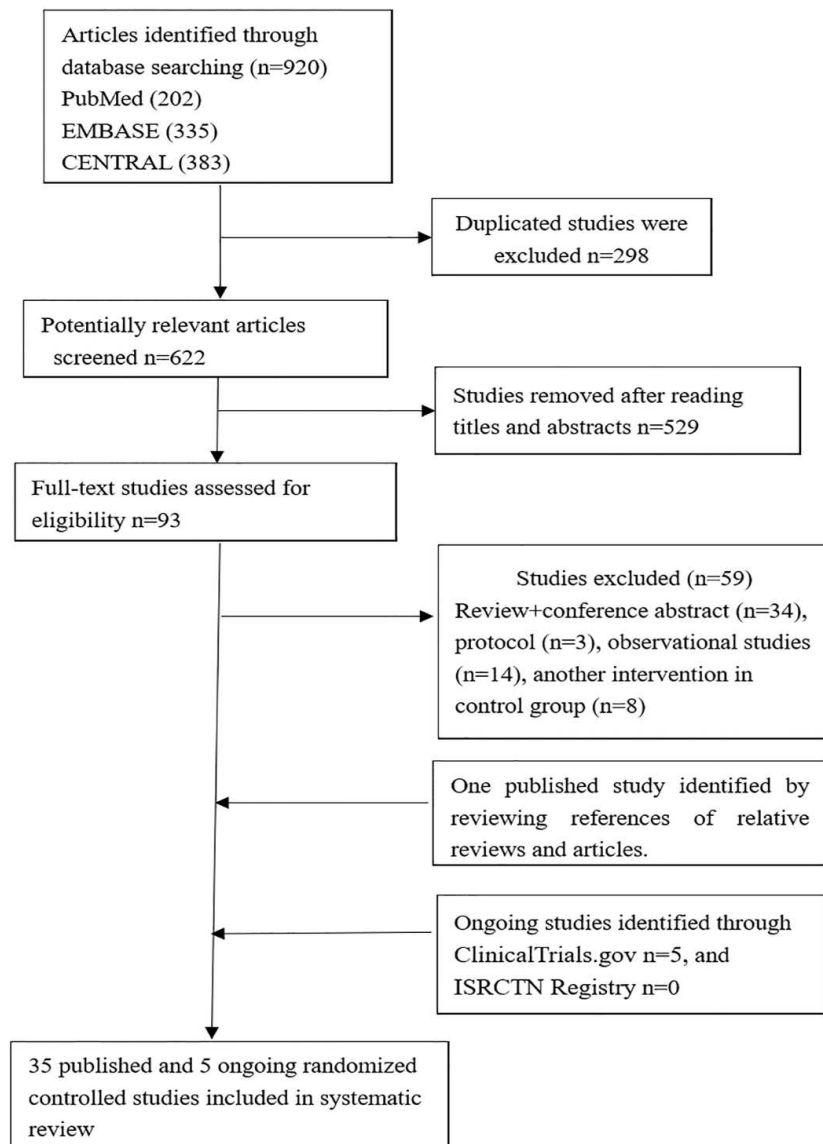

Figure S1: The flow diagram of identifying relevant studies.

|                       | Random sequence generation (selection bias) | Allocation concealment (selection bias) | Blinding of participants and personnel (performance bias) | Blinding of outcome assessment (detection bias) | Incomplete outcome data (attrition bias) | Selective reporting (reporting bias) | Other bias |
|-----------------------|---------------------------------------------|-----------------------------------------|-----------------------------------------------------------|-------------------------------------------------|------------------------------------------|--------------------------------------|------------|
| Al-Ansari 2010        | +                                           | +                                       | +                                                         | ?                                               | ?                                        | +                                    | +          |
| Angoulvant 2017       | +                                           | +                                       | +                                                         | +                                               | +                                        | +                                    | +          |
| Anil 2010             | +                                           | ?                                       | +                                                         | +                                               | +                                        | ?                                    | ?          |
| BaShir 2018           | +                                           | ?                                       | +                                                         | +                                               | +                                        | ?                                    | +          |
| Everard 2014          | +                                           | ?                                       | ?                                                         | ?                                               | +                                        | +                                    | ?          |
| Flores 2016           | +                                           | +                                       | +                                                         | +                                               | +                                        | ?                                    | +          |
| Florin 2014           | +                                           | +                                       | +                                                         | +                                               | +                                        | +                                    | +          |
| Grewal 2009           | +                                           | +                                       | +                                                         | +                                               | +                                        | +                                    | +          |
| Hmar 2021             | +                                           | ?                                       | ?                                                         | ?                                               | +                                        | +                                    | ?          |
| Ipek2011              | -                                           | ?                                       | +                                                         | +                                               | +                                        | ?                                    | ?          |
| Jacobs 2013           | +                                           | +                                       | +                                                         | +                                               | +                                        | +                                    | +          |
| Khanal 2015           | +                                           | +                                       | +                                                         | +                                               | +                                        | ?                                    | +          |
| Kose 2016             | +                                           | ?                                       | +                                                         | ?                                               | +                                        | ?                                    | ?          |
| Kuzik 2007            | +                                           | ?                                       | +                                                         | +                                               | +                                        | ?                                    | ?          |
| Kuzik 2010            | +                                           | ?                                       | +                                                         | +                                               | +                                        | +                                    | +          |
| Li 2014               | +                                           | ?                                       | ?                                                         | ?                                               | +                                        | ?                                    | ?          |
| Luo 2010              | +                                           | ?                                       | +                                                         | +                                               | +                                        | ?                                    | ?          |
| Luo 2011              | +                                           | +                                       | +                                                         | +                                               | ?                                        | ?                                    | +          |
| Mahesh Kumar2013      | +                                           | ?                                       | ?                                                         | ?                                               | +                                        | ?                                    | ?          |
| Mandelberg 2003       | +                                           | ?                                       | +                                                         | +                                               | +                                        | ?                                    | ?          |
| Miraglia 2012         | +                                           | ?                                       | +                                                         | +                                               | +                                        | +                                    | +          |
| Morikawa 2018         | +                                           | +                                       | -                                                         | +                                               | +                                        | ?                                    | ?          |
| Nenna2013             | +                                           | +                                       | +                                                         | ?                                               | +                                        | ?                                    | ?          |
| Ojha 2014             | +                                           | +                                       | +                                                         | +                                               | +                                        | ?                                    | +          |
| Pandit 2013           | +                                           | +                                       | -                                                         | -                                               | +                                        | ?                                    | ?          |
| Raphaelle 2019        | +                                           | ?                                       | ?                                                         | ?                                               | +                                        | +                                    | ?          |
| Ratajczyk-Pekrul 2016 | +                                           | +                                       | +                                                         | +                                               | +                                        | ?                                    | +          |
| Sarrell 2002          | +                                           | ?                                       | +                                                         | +                                               | +                                        | ?                                    | ?          |
| Sharma 2013           | +                                           | +                                       | +                                                         | +                                               | +                                        | ?                                    | +          |
| silver2015            | +                                           | +                                       | +                                                         | +                                               | +                                        | +                                    | +          |
| Tal 2006              | +                                           | ?                                       | +                                                         | +                                               | +                                        | ?                                    | +          |
| Teunissen 2014        | +                                           | ?                                       | +                                                         | +                                               | +                                        | ?                                    | +          |
| Tinsa 2014            | +                                           | ?                                       | +                                                         | +                                               | +                                        | ?                                    | +          |
| Uysalol 2017          | +                                           | ?                                       | +                                                         | ?                                               | +                                        | ?                                    | ?          |
| Wu 2014               | +                                           | ?                                       | +                                                         | +                                               | +                                        | -                                    | ?          |

Figure S2: Risk of bias summary: review authors' judgments about each risk of bias item for each included study.



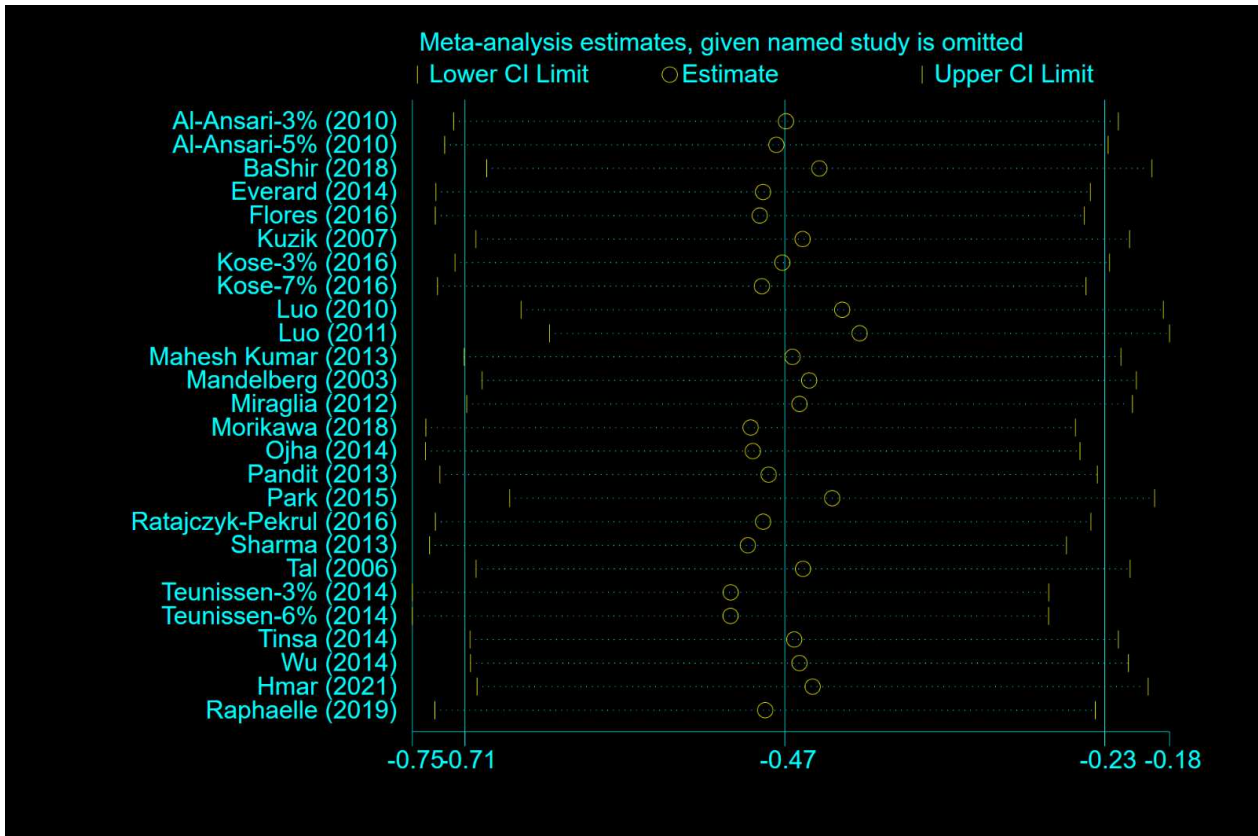

Figure S3: Sensitivity analysis for LOS in bronchiolitis: exclusion of a single study in turn. The study being cited on the left is the one being left out in each analysis.

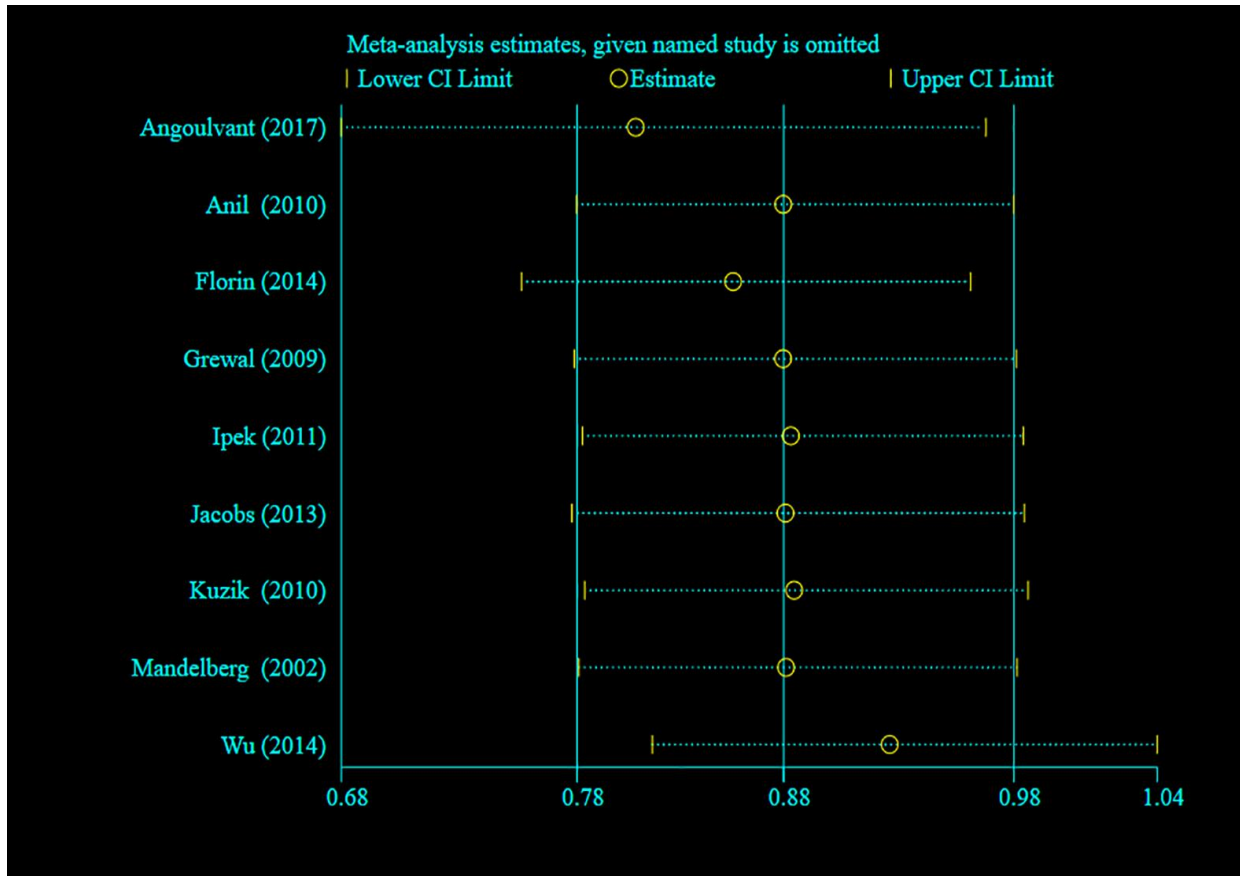

Figure S4: Sensitivity analysis for ROH in bronchiolitis: exclusion of a single study in turn. The study being cited on the left is the one being left out in each analysis.

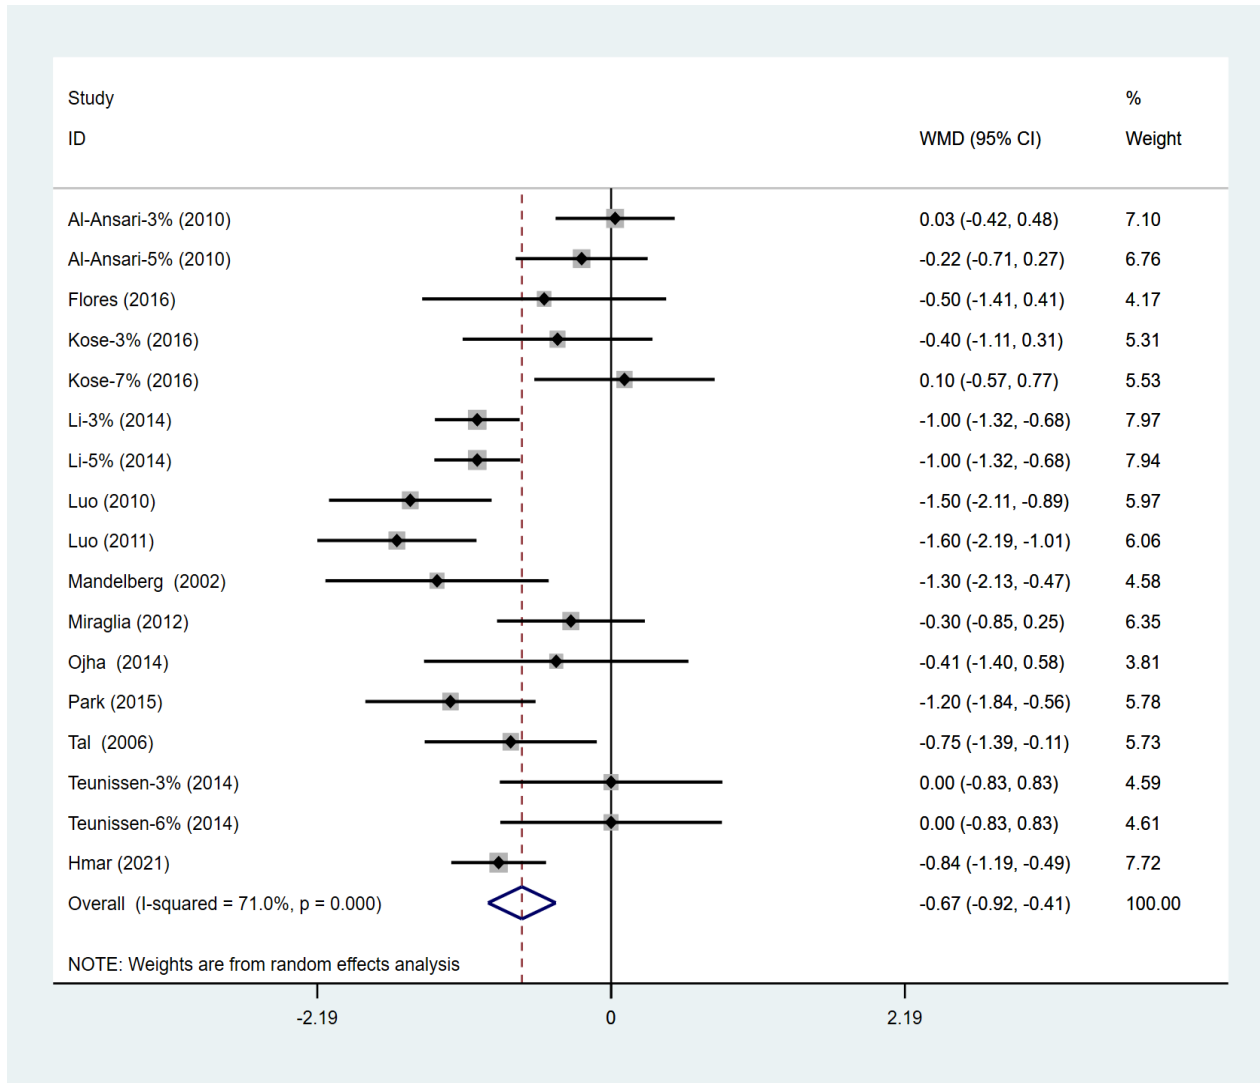

Figure S5: The effects of nebulized hypertonic saline treatment on the 24h-CSS in bronchiolitis.

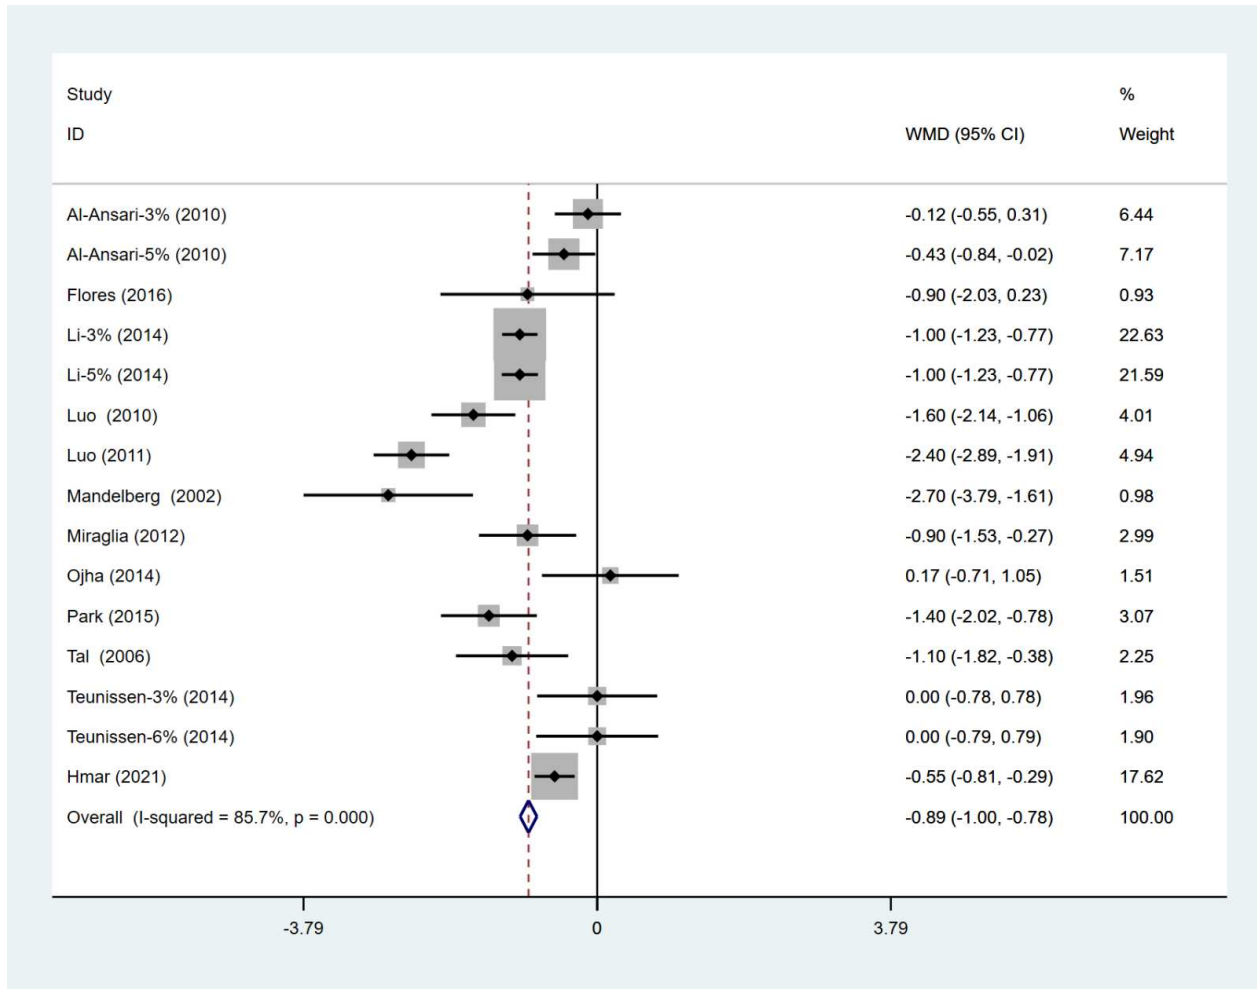

Figure S6: The effects of nebulized hypertonic saline treatment on the 48h-CSS in bronchiolitis.

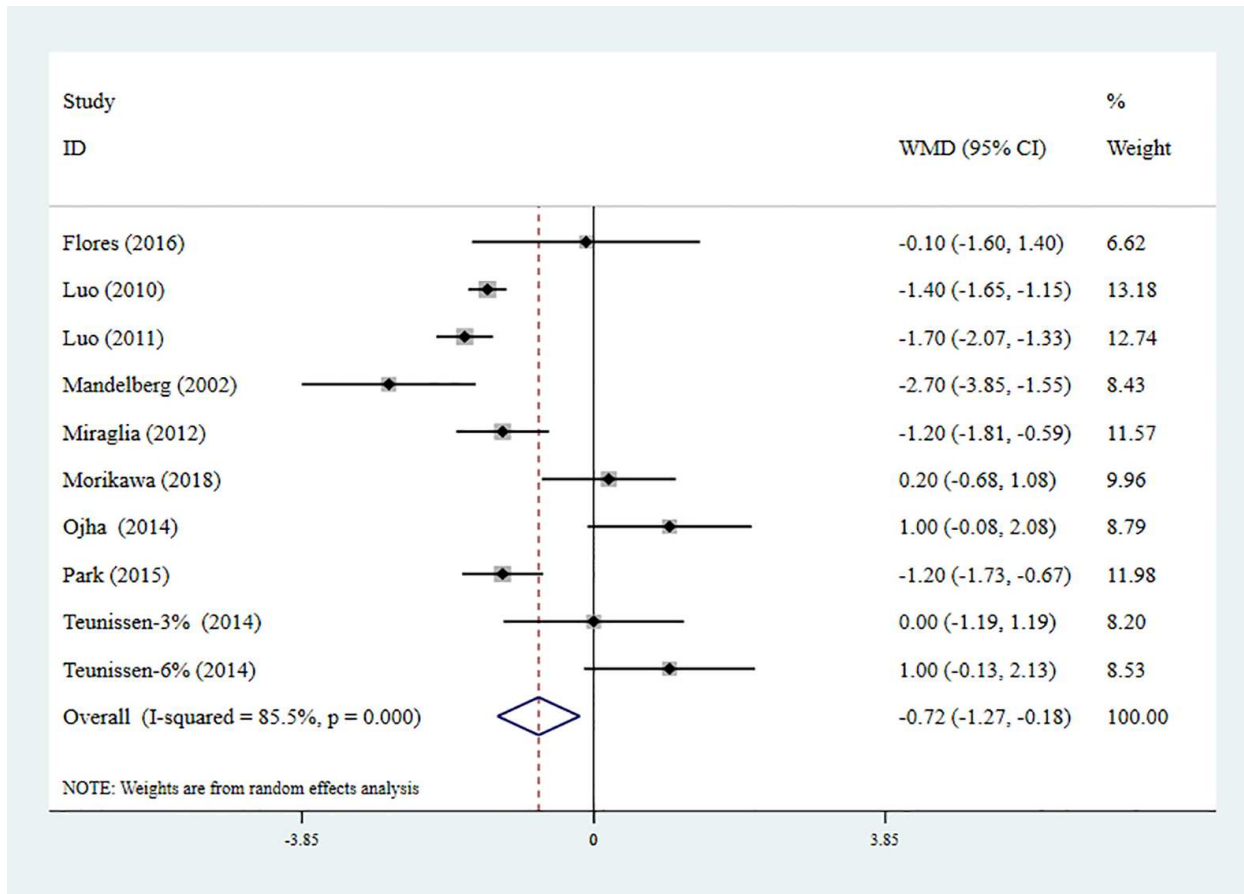

Figure S7: The effects of nebulized hypertonic saline treatment on the 72h-CSS in bronchiolitis.

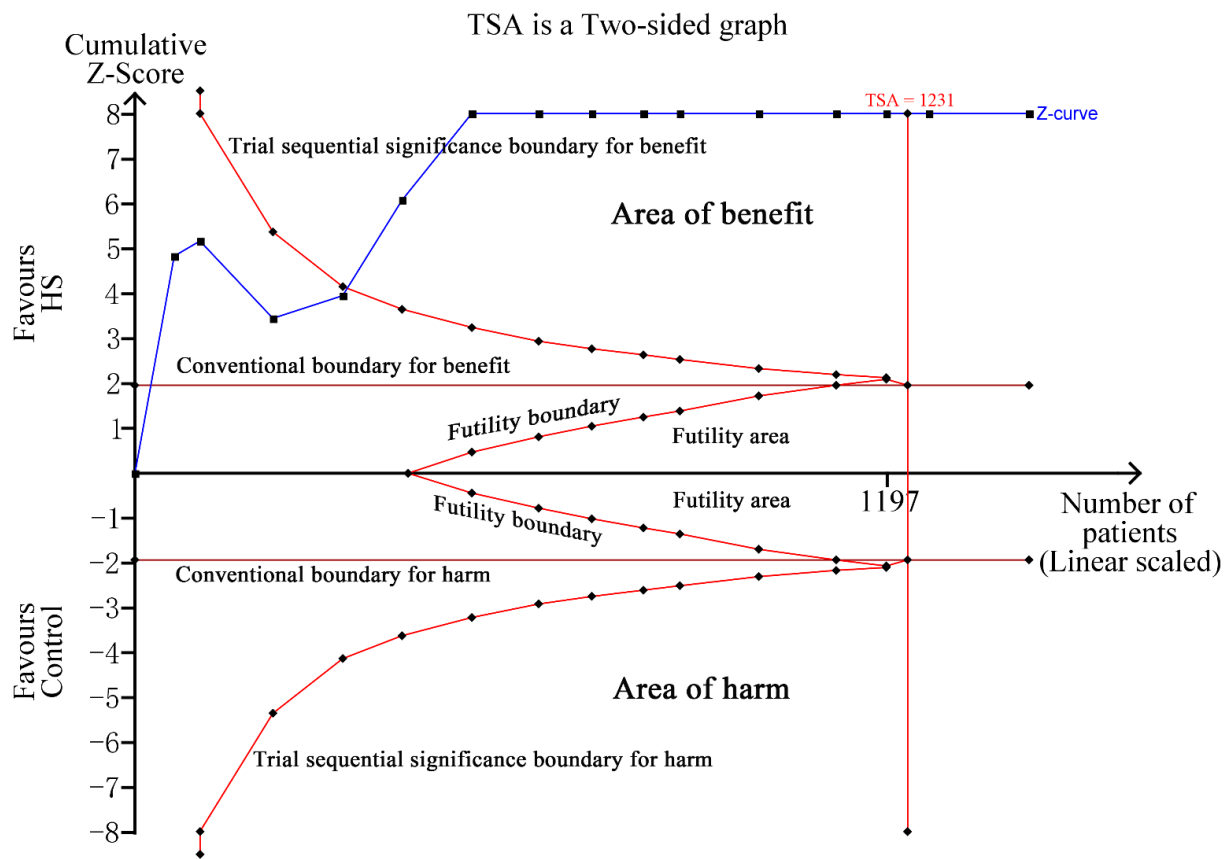

Figure S8: Trial sequential analysis for 24h-CSS in bronchiolitis,  $\alpha$  of 5 % (two sided),  $\beta$  of 20 %.

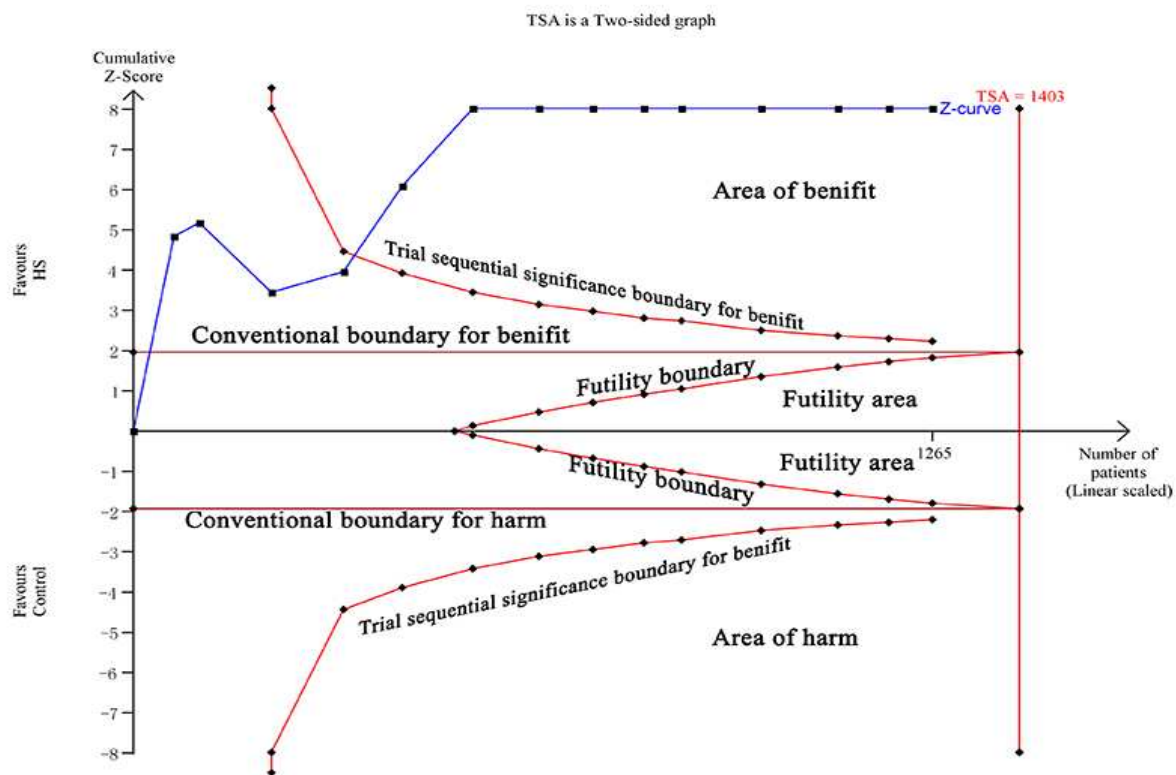

Figure S9: Trial sequential analysis for 48h-CSS in bronchiolitis,  $\alpha$  of 5 % (two sided),  $\beta$  of 20 %.

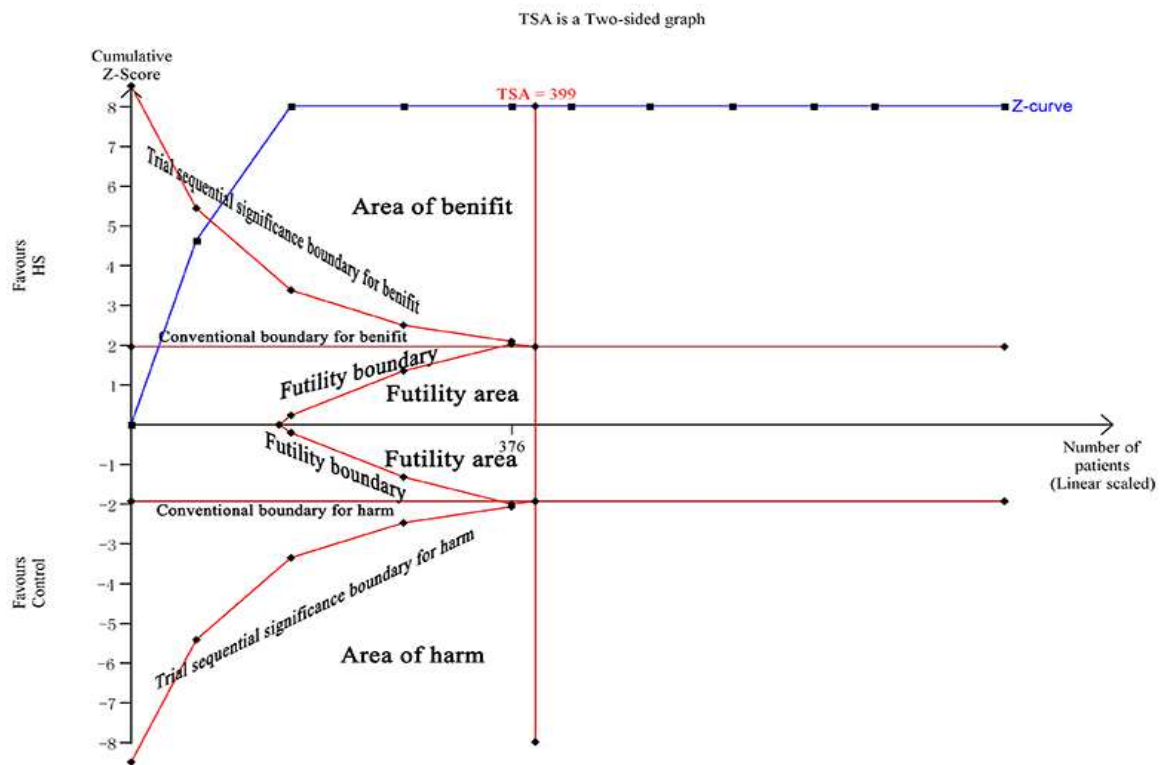

Figure S10: Trial sequential analysis for 72h-CSS in bronchiolitis,  $\alpha$  of 5 % (two sided),  $\beta$  of 20 %.





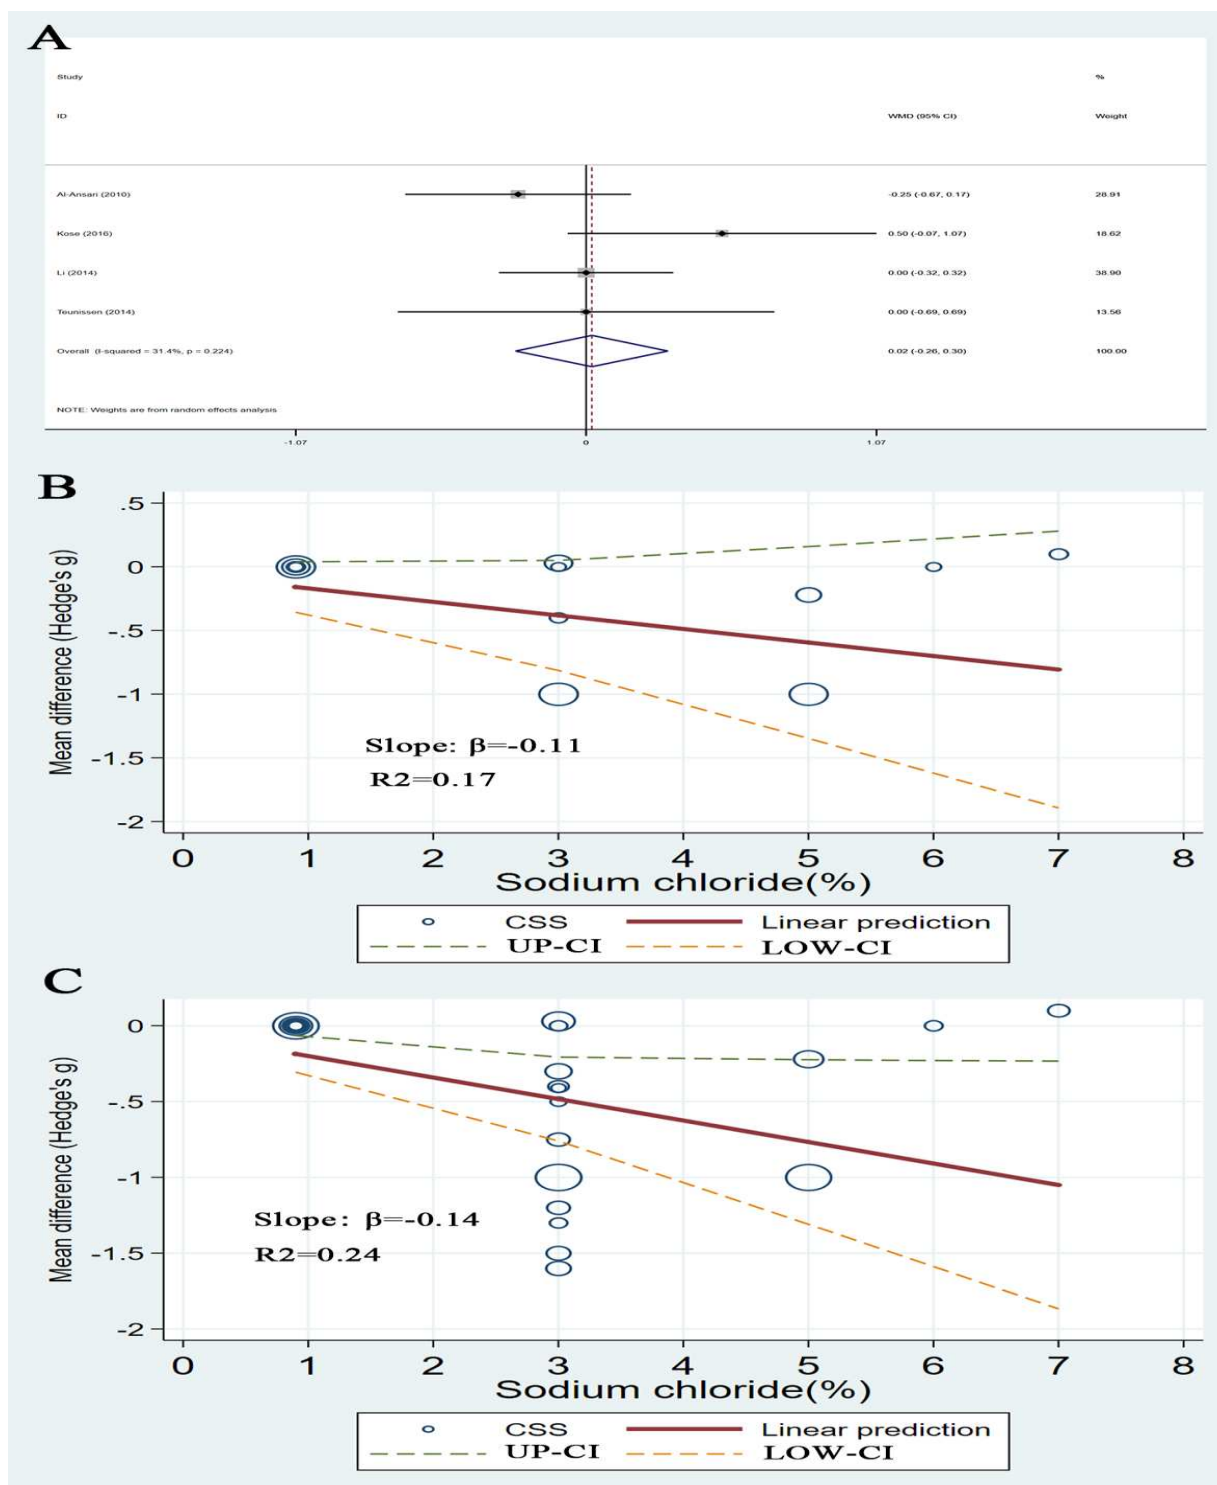

Figure S11: Exploring the appropriate dose of nebulized hypertonic saline for bronchiolitis in 24h-CSS. (A): there was no significant difference between 3% HS and the higher dose(>3%) of HS; (B): The random-effects dose-response meta-regression model with REMR approach of studies containing more than 2 doses of HS. (C): The random-effects dose-response meta-regression model with REMR approach of all studies.

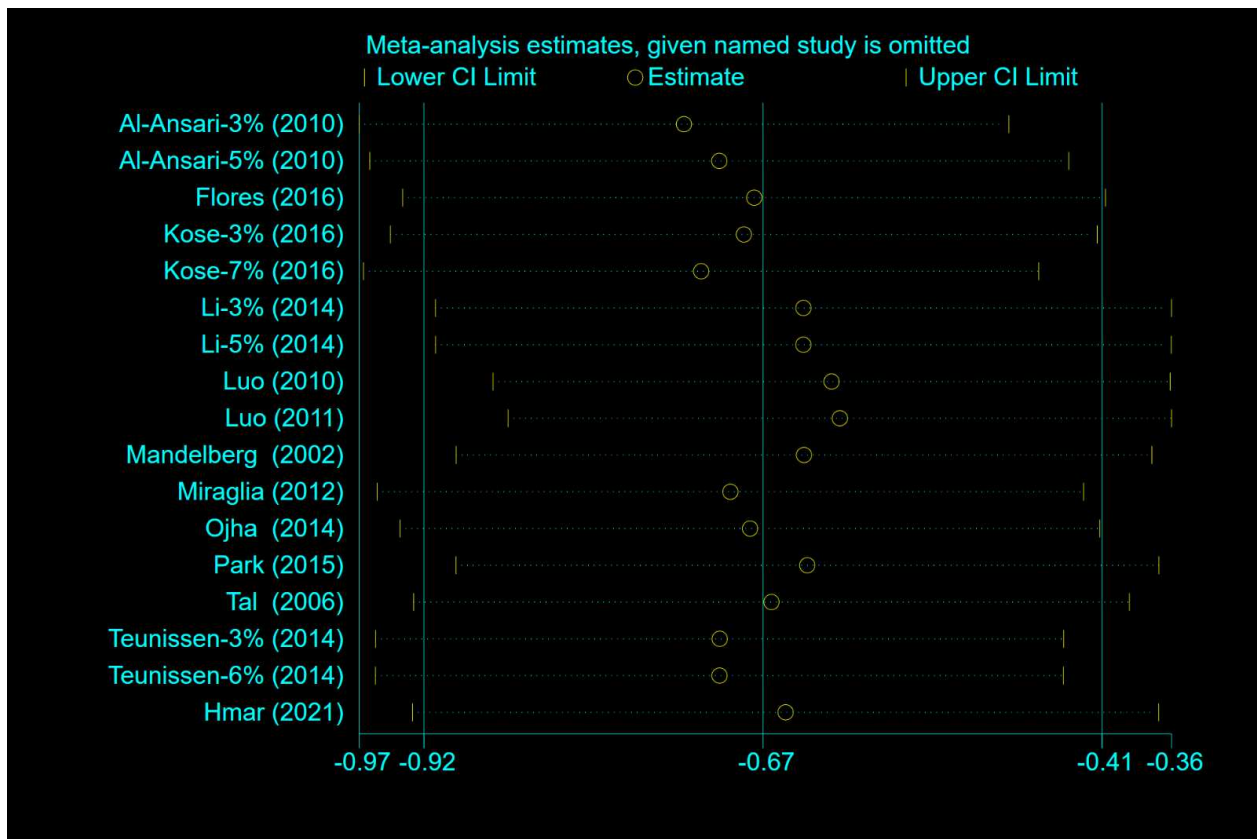

Figure S12: Sensitivity analysis for 24h-CSS in bronchiolitis: exclusion of a single study in turn. The study being cited on the left is the one being left out in each analysis.

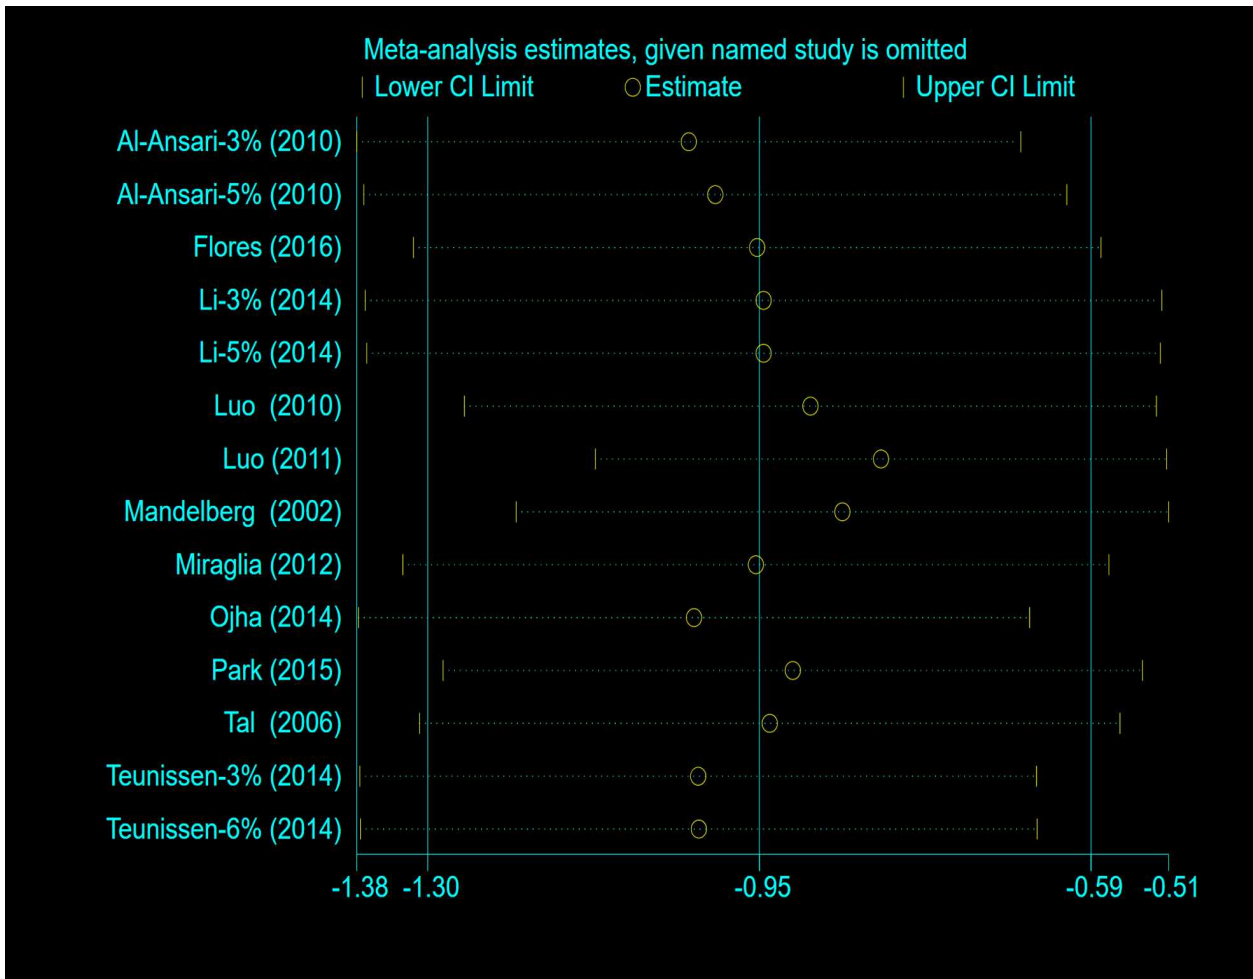

Figure S13: Sensitivity analysis for 48h-CSS in bronchiolitis: exclusion of a single study in turn. The study being cited on the left is the one being left out in each analysis.

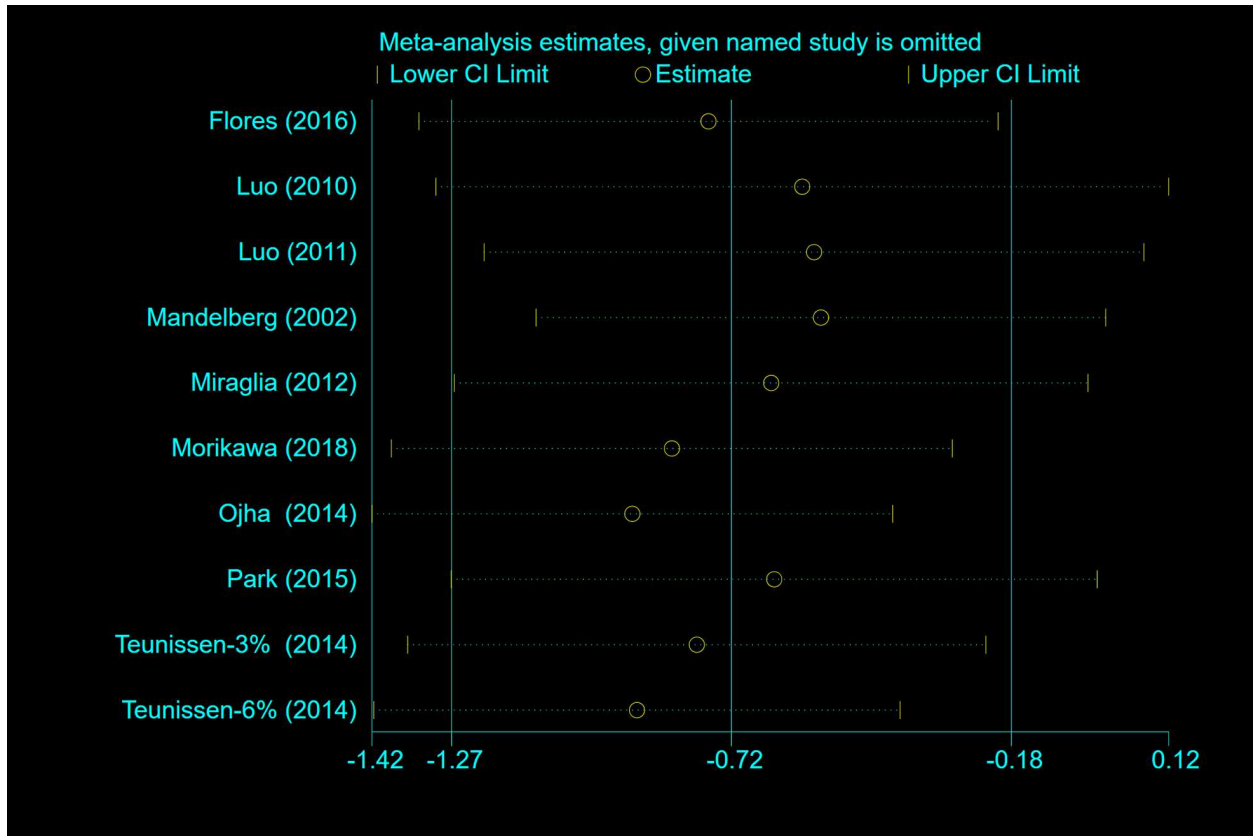

Figure S14: Sensitivity analysis for 72h-CSS in bronchiolitis: exclusion of a single study in turn. The study being cited on the left is the one being left out in each analysis.
